# Supplementary material for: Molecular Basis of ABHD5 Lipolysis Activation
Source: PubMed Central journal article supplement (PMC5314347; doi:10.1038/srep42589), 2017-02-17
Supplement: srep42589-s1.pdf [file srep42589-s1.pdf]

## Molecular Basis of ABHD5 Lipolysis Activation

Matthew A. Sanders<sup>1,2</sup>, Huamei Zhang<sup>1,2</sup>, Ljiljana Mladenovic<sup>1,2</sup>, Yan Yuan Tseng<sup>2,\*</sup>, and James G. Granneman<sup>1,2,\*</sup>

From the <sup>1</sup>Center for Integrative Metabolic and Endocrine Research and <sup>2</sup>Center for Molecular Medicine and Genetics, Wayne State University School of Medicine, Detroit, MI 48201

### Supplementary Figure S1

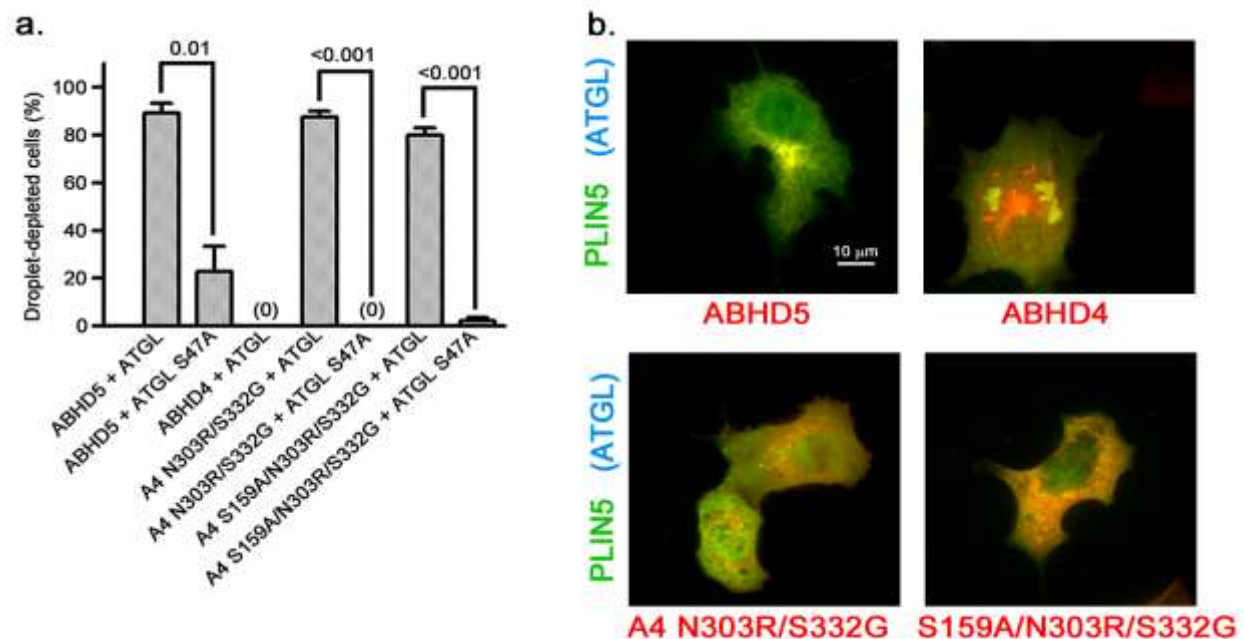

**Supplementary Figure S1.** ATGL activation by gain-of-function ABHD4 N303R/S332G is independent of ABHD4 hydrolase activity. **a)** Cos7 cells transfected with ABHD protein-mCherry, PLIN5-EYFP, and ATGL-CFP or ATGL S47A-CFP (lipase inactive) were lipid loaded overnight then fixed. Results are based on three independent experiments. **b)** Representative images of cells scored in **a)**. Scale bar = 10  $\mu$ m.

## Supplementary Figure S2

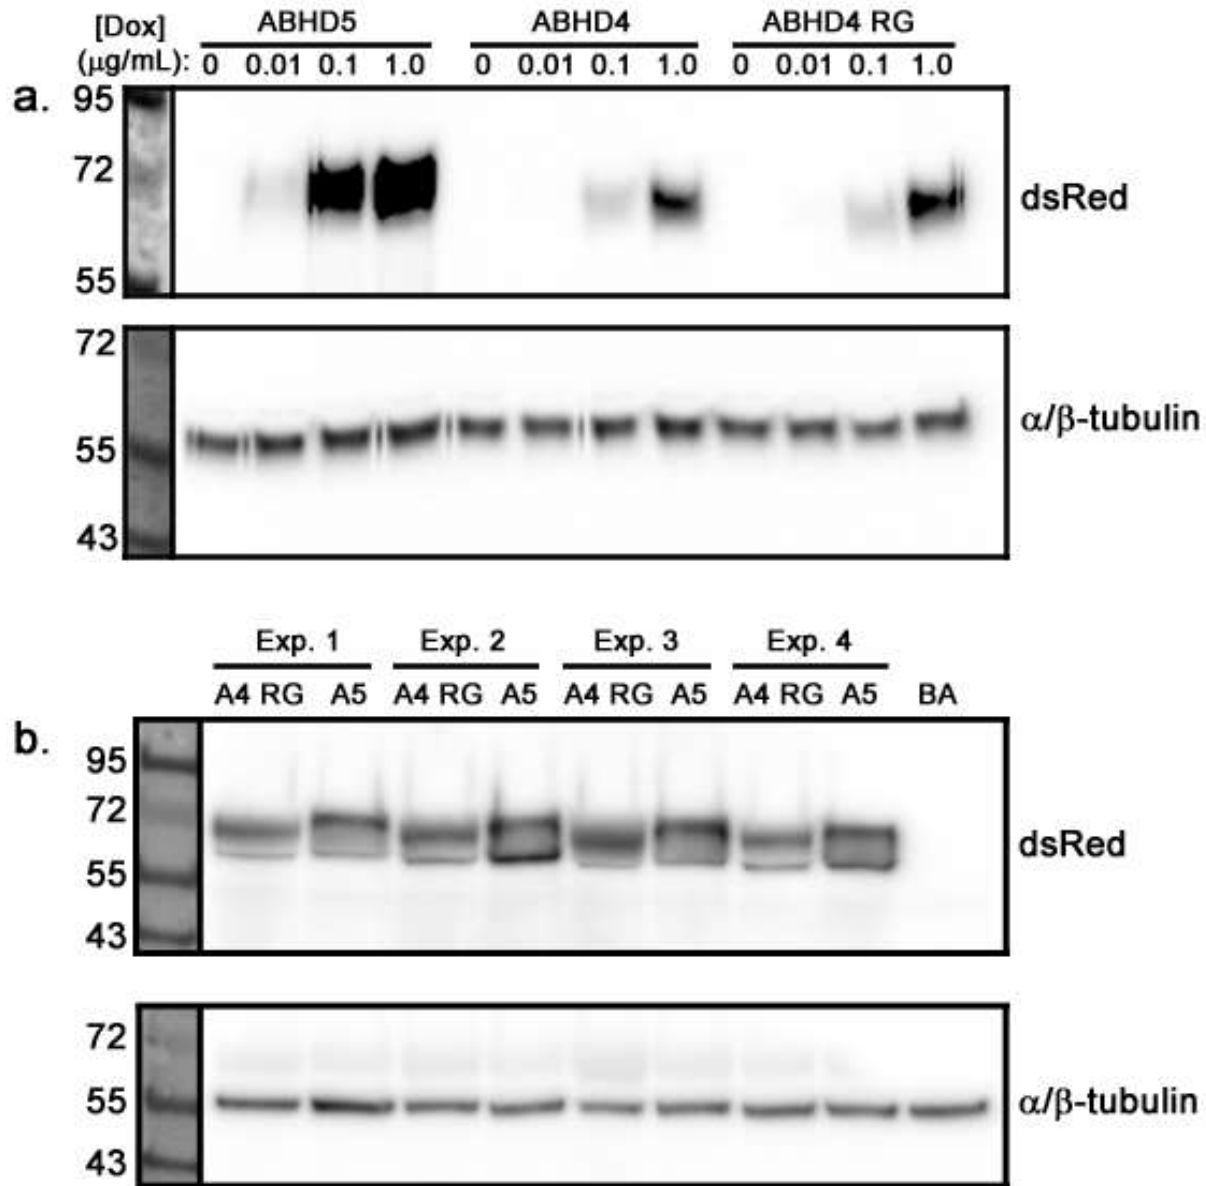

**Supplementary Figure S2.** Expression profile of re-expressed ABHD proteins in ABHD5-null BA cell lines. **a)** Representative immunoblot showing relative doxycycline-induced expression of ABHD5-mCherry, ABHD4-mCherry, and ABHD4 N303R/S332G-mCherry. This experiment was done twice with the same results. **b)** ABHD4 N303R/S332G-mCherry (A4 RG) and ABHD5-mCherry (A5) expression in BA cell lines from the four independent experiments used in figure 4c for comparing activity of the two proteins. ABHD4 N303R/S332G-mCherry expression was induced by 1  $\mu\text{g/ml}$  doxycycline, while ABHD5-mCherry expression was induced by 0.0125  $\mu\text{g/mL}$  doxycycline. BA, lysate from wild-type differentiated BA cells.
